# Supplementary material for: Clinical and Genetic Characteristics of Korean Patients Diagnosed with Chronic Enteropathy Associated with SLCO2A1 Gene: A KASID Multicenter Study
Source: PubMed Central journal article supplement — Gut Liver. 2022 May 25;16(6):942–51. doi: 10.5009/gnl210415 (PMC9668493; doi:10.5009/gnl210415), 2022-05-25
Supplement: gnl-16-6-942-supple.pdf [file gnl-16-6-942-supple.pdf]

**Supplementary Table 1.** Characteristics of Individual Patients

| No | Sex | Age at symptom onset, yr | Age at diagnosis, yr | Family history of CEAS | History of taking NSAIDs | Presenting symptoms                      | History of bowel resection | Involved sites                           | PHO manifestations                         | Tuber-culosis tests* | Laboratory data |                     |                     |            |                  | Genotype data of <i>SLCO2A1</i> gene |                          |                       |
|----|-----|--------------------------|----------------------|------------------------|--------------------------|------------------------------------------|----------------------------|------------------------------------------|--------------------------------------------|----------------------|-----------------|---------------------|---------------------|------------|------------------|--------------------------------------|--------------------------|-----------------------|
|    |     |                          |                      |                        |                          |                                          |                            |                                          |                                            |                      | Hb, g/dL        | Serum protein, g/dL | Serum albumin, g/dL | ESR, mm/hr | Serum CRP, mg/dL |                                      | Fecal calprotectin, µg/g |                       |
| 1  | F   | 21                       | 39                   | No                     | No                       | Abdominal pain, loose stool, weight loss | No                         | Jejunum, ileum except for terminal ileum | Digital clubbing, periostosis              | Negative             | 7.9             | 4.9                 | 1.9                 | 2          | 1.11             | 10,679                               | Homozygous mutation      | Wild type             |
| 2  | F   | 32                       | 45                   | No                     | No                       | Abdominal pain, weight loss              | Yes                        | Ileum                                    | Digital clubbing, arthralgia               | NA                   | 9.1             | 5.4                 | 2.7                 | 10         | 0.46             | 1,085                                | Heterozygous mutation    | Heterozygous mutation |
| 3  | F   | 37                       | 48                   | Yes                    | No                       | Abdominal pain                           | No                         | Stomach, duodenum, ileum, colon          | NA                                         | Negative             | 12.7            | 6.2                 | 3.0                 | 4          | 0.17             | 350                                  | Wild type                | Homozygous mutation   |
| 4  | F   | 34                       | 44                   | Yes                    | Yes                      | Abdominal pain                           | No                         | Stomach, duodenum, ileum                 | None                                       | Negative             | 11.0            | 4.7                 | 2.0                 | 7          | 0.36             | 593                                  | Wild type                | Homozygous mutation   |
| 5  | F   | 2                        | 19                   | Yes                    | No                       | Abdominal pain                           | Yes                        | Ileum except for terminal ileum          | NA                                         | NA                   | 7.3             | 4.6                 | 2.3                 | 3          | 0.14             | 4,765                                | Heterozygous mutation    | Heterozygous mutation |
| 6  | M   | 11                       | 54                   | Yes                    | No                       | Abdominal pain, loose stool, GI bleeding | Yes                        | Duodenum, jejunum, ileum, colon          | Digital clubbing, pachydermia, periostosis | Negative             | 10.0            | 4.5                 | 1.9                 | 3          | 0.84             | 1,297                                | Heterozygous mutation    | Heterozygous mutation |
| 7  | F   | 12                       | 16                   | Yes                    | Yes                      | Abdominal pain, loose stool              | No                         | Ileum                                    | Arthralgia                                 | NA                   | 9.5             | 7.9                 | 4.0                 | 8          | 0.1              | 98.7                                 | Heterozygous mutation    | Heterozygous mutation |
| 8  | F   | 11                       | 34                   | NA                     | No                       | Abdominal pain, loose stool, GI bleeding | Yes                        | Jejunum, ileum                           | NA                                         | Negative             | 6.8             | 4.1                 | 1.8                 | NA         | NA               | NA                                   | Heterozygous mutation    | Heterozygous mutation |
| 9  | F   | 12                       | 21                   | No                     | No                       | Abdominal pain                           | No                         | Ileum                                    | None                                       | Negative             | 6.8             | 5.5                 | 2.8                 | 7          | 0.66             | 789                                  | Heterozygous mutation    | Heterozygous mutation |
| 10 | F   | 28                       | 52                   | NA                     | Yes                      | Abdominal pain, loose stool              | No                         | Ileum                                    | Digital clubbing, pachydermia, periostosis | Negative             | 10.0            | 5.2                 | 2.9                 | 10         | 0.20             | 1,905                                | Wild type                | Homozygous mutation   |
| 11 | F   | 40                       | 51                   | No                     | Yes                      | Abdominal pain                           | Yes                        | Jejunum, ileum except for terminal ileum | Arthralgia                                 | Positive for IGRA    | 11.1            | 7.9                 | 3.9                 | 7          | 0.13             | 31.2                                 | Heterozygous mutation    | Heterozygous mutation |

**Supplementary Table 1.** Continued

| No | Sex | Age at symptom onset, yr | Age at diagnosis, yr | Family history of CEAS | History of taking NSAIDs | Presenting symptoms                      | History of bowel resection | Involved sites           | PHO manifestations                            | Tuberculosis tests* | Laboratory data |                     |                     |            | Genotype data of <i>SLCO2A1</i> gene |                  |                          |                       |
|----|-----|--------------------------|----------------------|------------------------|--------------------------|------------------------------------------|----------------------------|--------------------------|-----------------------------------------------|---------------------|-----------------|---------------------|---------------------|------------|--------------------------------------|------------------|--------------------------|-----------------------|
|    |     |                          |                      |                        |                          |                                          |                            |                          |                                               |                     | Hb, g/dL        | Serum protein, g/dL | Serum albumin, g/dL | ESR, mm/hr |                                      | Serum CRP, mg/dL | Fecal calprotectin, µg/g |                       |
| 12 | F   | NA                       | 63                   | No                     | NA                       | Abdominal pain, loose stool, weight loss | No                         | Duodenum, jejunum, ileum | None                                          | Negative            | 9.9             | 3.5                 | 2.3                 | 2          | 9.80                                 | 1,000            | Homozygous mutation      | Wild type             |
| 13 | M   | 15                       | 29                   | NA                     | No                       | Abdominal pain, loose stool              | Yes                        | Duodenum, jejunum        | Digital clubbing, NA pachydermia, periostosis | NA                  | 8.2             | 5.3                 | 2.7                 | 3          | 0.12                                 | 211              | Heterozygous mutation    | Heterozygous mutation |
| 14 | F   | NA                       | 45                   | No                     | No                       | Abdominal pain, GI bleeding              | Yes                        | Ileum                    | Arthralgia                                    | Negative            | 9.7             | 6.2                 | 4.3                 | 11         | 7.72                                 | 152              | Wild type                | Homozygous mutation   |

CEAS, chronic enteropathy associated with *SLCO2A1* gene; NSAIDs, nonsteroidal anti-inflammatory drugs; PHO, primary hypertrophic osteoarthropathy; Hb, hemoglobin; ESR, erythrocyte sedimentation rate; CRP, C-reactive protein; F, female; M, male; GI, gastrointestinal; NA, not available; IGRA, interferon-gamma release assay.

\*Tuberculosis tests include tuberculin skin test, interferon-gamma release assay, tuberculosis-specific ELISPOT assay, and acid-fast bacilli stain, *Mycobacterium tuberculosis* culture and polymerase chain reaction of intestinal biopsy tissue.

**Supplementary Table 2.** Presumed Nonpathogenic *SLCO2A1* Polymorphisms in 14 Korean Patients Confirmed to Have Chronic Enteropathy Associated with *SLCO2A1* Gene

| No. | Genomic position chr3 (hg19) | Nucleotide change | Amino acid change | dbSNP       | Mutant allele frequency* | gnomAD frequency <sup>†</sup> | Polyphen2 | MutationTaster |
|-----|------------------------------|-------------------|-------------------|-------------|--------------------------|-------------------------------|-----------|----------------|
| 1   | 133,666,209                  | c.1186G>A         | p.A396T           | rs34550074  | 0.286                    | 2.53E-01                      | Benign    | Polymorphism   |
| 2   | 133,935,791                  | c.210G>A          | p.S70S            | rs10935090  | 0.393                    | 5.55E-01                      |           | Polymorphism   |
| 3   | 133,670,073                  | c.840A>G          | p.R280R           | rs6767412   | 0.429                    | 2.54E-01                      |           | Polymorphism   |
| 4   | 133,654,635                  | c.2071C>T         | p.N599N           | rs117837593 | 0.429                    | 2.49E-02                      |           | Polymorphism   |

\*Mutant allele frequency in our 14 patients; <sup>†</sup>Genome Aggregation Database (gnomAD) East Asian frequency (GRCh37).

**Supplementary Table 3.** Presumed Nonpathogenic *SLCO2A1* Polymorphisms in 32 Korean Patients Who Were Not Confirmed to Have Chronic Enteropathy Associated with *SLCO2A1* Gene

| No. | Genomic position chr3 [hg19] | Nucleotide change | Amino acid change  | dbSNP        | Mutant allele frequency* | GenomAD frequency <sup>†</sup> | Polyphen2 | MutationTaster               | ClinVar                        |
|-----|------------------------------|-------------------|--------------------|--------------|--------------------------|--------------------------------|-----------|------------------------------|--------------------------------|
| 1   | 133,666,209                  | c.1186G>A         | p.A396T            | rs34550074   | 0.266                    | 2.53E-01                       | Benign    | Polymorphism                 | Not reported                   |
| 2   | 133,935,791                  | c.210G>A          | p.S70S             | rs10935090   | 0.344                    | 5.55E-01                       | Benign    | Polymorphism                 | Not reported                   |
| 3   | 133,670,073                  | c.840A>G          | p.R280R            | rs6767412    | 0.297                    | 2.54E-01                       | Benign    | Polymorphism                 | Not reported                   |
| 4   | 133,654,635                  | c.2071C>T         | p.I599N            | rs117837593  | 0.063                    | 2.49E-02                       | Benign    | Polymorphism                 | Benign                         |
| 5   | 133,666,104                  | c.1279_1290del    | p.Glu427_Pro430del | rs1085307096 | 0.016                    | 5.44E-05                       | Benign    | Disease-causing <sup>‡</sup> | Likely pathogenic <sup>§</sup> |
| 6   | 133,657,306                  | c.1657A>G         | p.Ile553Val        | rs199895359  | 0.016                    | 4.66E-03                       | Benign    | Disease-causing <sup>‡</sup> | Likely benign                  |

\* Mutant allele frequency in 32 patients in this study; <sup>†</sup>Genome Aggregation Database (gnomAD) East Asian frequency (GRCh37); <sup>‡</sup>Grantham scores; 29 (chemical dissimilarity was designated "conservative");

<sup>§</sup>In the condition of primary hypertrophic osteoarthritis, autosomal recessive 2.
